# Supplementary material
Source: publisher figshare collection journal article supplement (https://acs.figshare.com/ndownloader/files/15633557)
Supplement: Supplementary file 1 [file 15633557]

# **Magnet-Responsive Silica Microrods as Solid Stabilizer and Adsorbent for Simultaneous Removal of Coexisting Contaminants in Water**

Dafan Chen,<sup>†,‡</sup> Yiming Li,<sup>\*,†</sup> Mutai Bao,<sup>†</sup> Yajie Hou,<sup>†</sup> Jiafeng Jin,<sup>†</sup> Zichao Yin<sup>†</sup>  
and Zhining Wang<sup>\*,‡</sup>

<sup>†</sup>Key Laboratory of Marine Chemistry Theory and Technology, Ministry of Education,  
Ocean University of China, No. 238 Songling Road, Qingdao 266100, P. R. China

<sup>‡</sup>Shandong Key Laboratory of Water Pollution Control and Resource Reuse, School of  
Environmental Science and Engineering, Shandong University, No. 27 Shandan Road,  
Jinan 250100, P. R. China

Number of Pages: 14

Number of Figures: 7

Number of Tables: 3

---

\* Corresponding author.

E-mail address: [liyym@ouc.edu.cn](mailto:liyym@ouc.edu.cn) (Y. M. Li); [wangzhn@sdu.edu.cn](mailto:wangzhn@sdu.edu.cn) (Z.N. Wang).

## **1. Preparation of materials**

### **1.1. Preparation of SiO<sub>2</sub> particles**

Silica microrods were prepared by the method reported by Kuijk et al and He et al.<sup>1-3</sup> 15 g of polyvinylpyrrolidone was added to 150 mL of n-pentanol in a 500 mL conical flask, and sonicated to dissolve. Then 15 mL of ethanol, 4.2 mL of deionized water and 1 mL of 0.18 mol L<sup>-1</sup> sodium citrate solution were added orderly. After, the resulting mixture was stirred to make the solution uniform. 3.4 mL of NH<sub>4</sub>OH and 1.5 mL of TEOS were introduced into the system and then the mixture was stirred again. The conical flask was placed in 30 °C thermostatic bath for 24 h. Solid particles obtained by centrifugation at 6000 rpm for 8 min, and washed by ethanol and water for 2 times. The silica microrods were dried in a vacuum freeze dryer for 24 h and then stored in dry form.

The spherical SiO<sub>2</sub> used in the interface adsorption energy calculation was synthesized by the conventional Stöber method.<sup>4</sup> Firstly, 181 mL of ethanol, 64 mL of deionized double distilled water and 5 mL of NH<sub>4</sub>OH were mixed. To the aqueous solutions, 70 mmol of TEOS was added. The mixture was shaken at a rotation rate of 100 rpm using a shaker for 2 h at 30 °C, and white products were formed. They were collected by centrifugation (7000 rpm, 10 min) and washed by repeating redispersion in ethanol for five times. The final precipitates were dried at room temperature.

### **1.2. Preparation of Fe<sub>3</sub>O<sub>4</sub>@SiO<sub>2</sub> particles**

0.1500 g SiO<sub>2</sub> microrods was dispersed in 50 ml deionized water to obtain the aqueous dispersion. 1.0 mmol L<sup>-1</sup> HCl was added to the aqueous dispersion to achieve pH = 6.5. 1.05 g of FeSO<sub>4</sub> · 7H<sub>2</sub>O was added under a N<sub>2</sub> atmosphere and then stirred overnight. Next, 0.104 g of NaNO<sub>2</sub> were added under stirring. Then, 12.5 mL NH<sub>4</sub>OH solution were quickly introduced into the system under vigorous stirring. The color of

the mixture became black after 2 h. The whole process was carried out in a N<sub>2</sub> atmosphere. The resulting dispersion was washed with deionized water under a N<sub>2</sub> atmosphere using the magnetic properties. The resulting Fe<sub>3</sub>O<sub>4</sub>@SiO<sub>2</sub> were also dried in a vacuum freeze dryer for 24 h and then were stored in dry form.<sup>5</sup> The ratio of Fe<sub>3</sub>O<sub>4</sub> to SiO<sub>2</sub> in the composite is critical to contaminants removal. In this study, the coating density of R-SiO<sub>2</sub> by Fe<sub>3</sub>O<sub>4</sub> was regulated by changing the amount of FeSO<sub>4</sub> · 7H<sub>2</sub>O in suspension. According to the mass of FeSO<sub>4</sub> · 7H<sub>2</sub>O used, theoretical mass of Fe<sub>3</sub>O<sub>4</sub> on R-SiO<sub>2</sub> is calculated. The suitable mass ratio ( $m_{\text{SiO}_2}:m_{\text{Fe}_3\text{O}_4}=1:1.5$ ) was used in this study according to the results of oil removal experiments under different ratios.

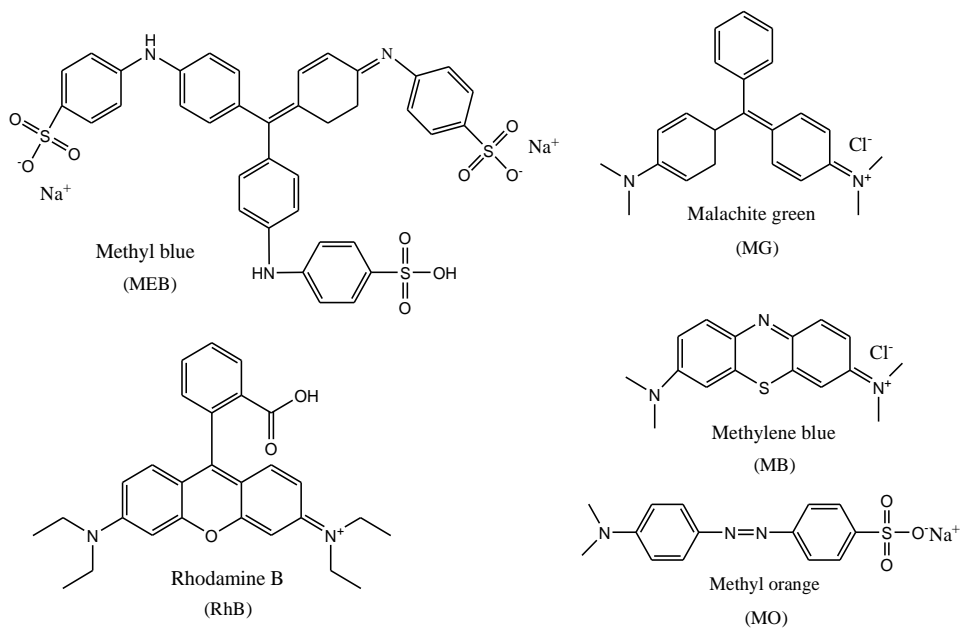

**Figure S1.** Molecular structure of different dyes.

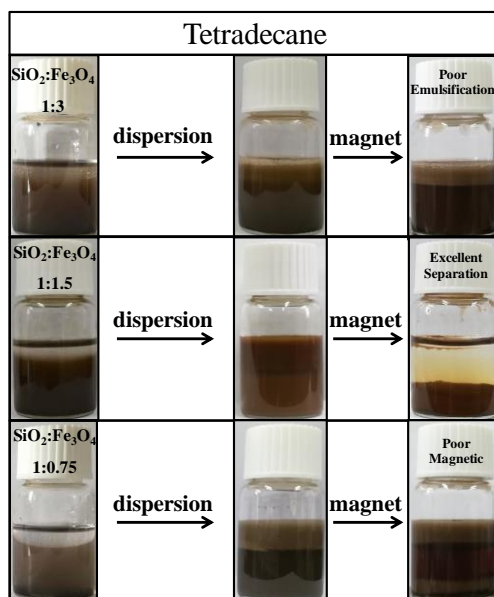

**Figure S2.** Photographs of tetradecane removal by R-Fe<sub>3</sub>O<sub>4</sub>@SiO<sub>2</sub> particles synthesized under different mass ratios of SiO<sub>2</sub> and Fe<sub>3</sub>O<sub>4</sub>. The oil-to-water volume ratio was 1:4 and the concentration of R-Fe<sub>3</sub>O<sub>4</sub>@SiO<sub>2</sub> was 4 g L<sup>-1</sup>.

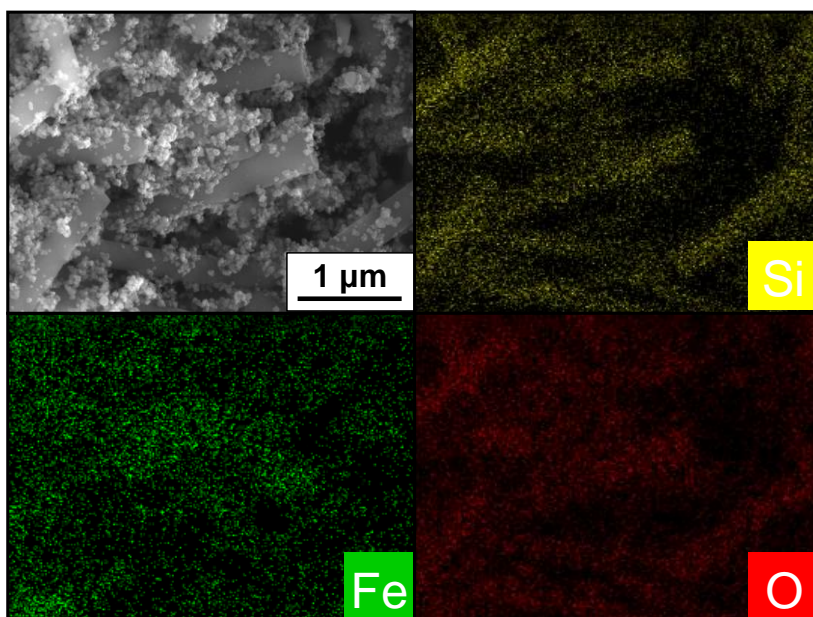

**Figure S3.** SEM image and corresponding elemental mapping of R-Fe<sub>3</sub>O<sub>4</sub>@SiO<sub>2</sub>.

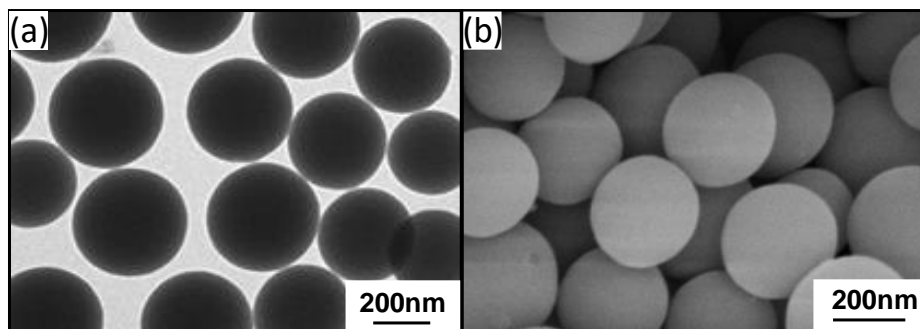

**Figure S4.** TEM and SEM images of spherical silica nanoparticles (a and b).

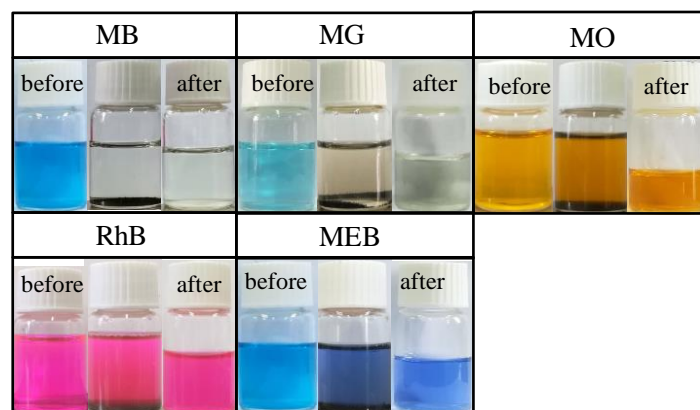

**Figure S5.** The photographs of removing different dyes from polluted water ( $C_0=10$  mg L<sup>-1</sup>).



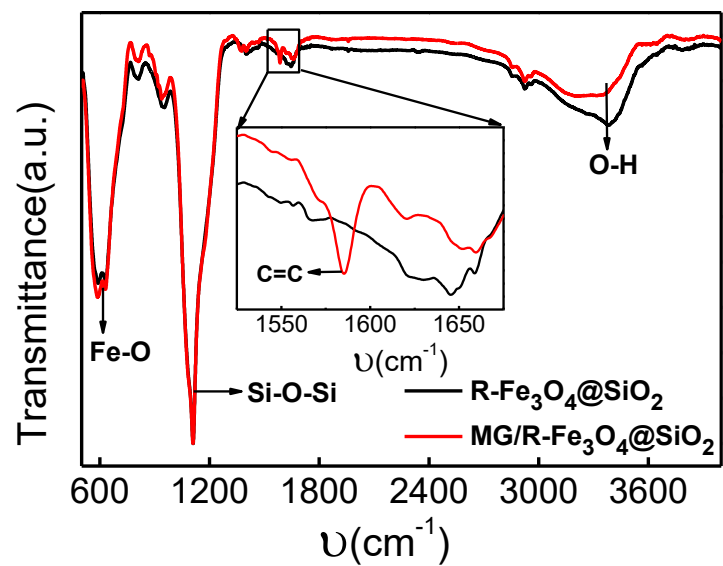

**Figure S6.** The FT-IR spectra before and after MG adsorption on R-Fe<sub>3</sub>O<sub>4</sub>@SiO<sub>2</sub>.

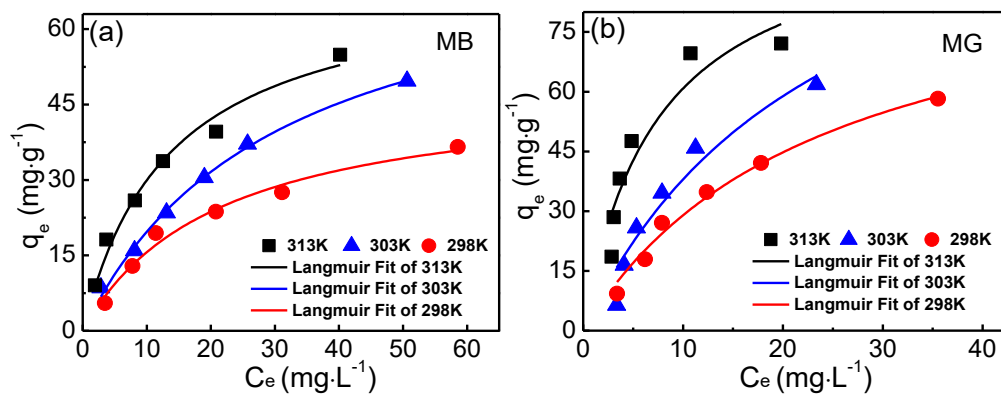

**Figure S7.** Langmuir adsorption isotherms of MB and MG at different temperatures.

**Table S1.** The related parameters of the calculation of interface adsorption energy.

| Sample                                             | $\bar{R}$ (nm) | $l$ ( $\mu\text{m}$ ) | $\theta$ ( $^\circ$ ) | $\gamma_{ow}$ ( $\text{mN m}^{-1}$ ) | $\Delta E$ ( $kT$ ) |
|----------------------------------------------------|----------------|-----------------------|-----------------------|--------------------------------------|---------------------|
| S-Fe <sub>3</sub> O <sub>4</sub> @SiO <sub>2</sub> | 151            | -                     | 38.1                  | 33.6                                 | $2.86 \times 10^4$  |
| R-Fe <sub>3</sub> O <sub>4</sub> @SiO <sub>2</sub> | 153            | 3                     | 24.4                  | 37.9                                 | $2.10 \times 10^5$  |

**Table S2.** Langmuir and Freundlich parameters for adsorption of heavy metal ions.

| Samples          | Langmuir                    |                             |                | Freundlich                                                             |      |                |
|------------------|-----------------------------|-----------------------------|----------------|------------------------------------------------------------------------|------|----------------|
|                  | $q_m$ (mg g <sup>-1</sup> ) | $K_L$ (L mg <sup>-1</sup> ) | R <sup>2</sup> | $K_f$<br>((mg g <sup>-1</sup> ) (L mg <sup>-1</sup> ) <sup>1/n</sup> ) | 1/n  | R <sup>2</sup> |
| Cr <sup>3+</sup> | 384.62                      | 0.0046                      | 0.996          | 6.846                                                                  | 1.72 | 0.983          |
| Pb <sup>2+</sup> | 346.02                      | 0.0058                      | 0.998          | 7.955                                                                  | 1.71 | 0.982          |
| Zn <sup>2+</sup> | 308.64                      | 0.0042                      | 0.997          | 4.134                                                                  | 1.51 | 0.987          |
| Cu <sup>2+</sup> | 322.58                      | 0.0049                      | 0.997          | 6.227                                                                  | 1.58 | 0.991          |
| Co <sup>2+</sup> | 316.46                      | 0.0048                      | 0.987          | 4.847                                                                  | 1.53 | 0.962          |

**Table S3.** Kinetic parameters for adsorption of heavy metal ions.

| Samples          | $q_{e,exp}$<br>(mg g <sup>-1</sup> ) | Pseudo-first-order                   |                               |                | Pseudo-second-order                  |                                                  |                |
|------------------|--------------------------------------|--------------------------------------|-------------------------------|----------------|--------------------------------------|--------------------------------------------------|----------------|
|                  |                                      | $q_{e,cal}$<br>(mg g <sup>-1</sup> ) | $K_1$<br>(min <sup>-1</sup> ) | R <sup>2</sup> | $q_{e,cal}$<br>(mg g <sup>-1</sup> ) | $K_2$<br>(g mg <sup>-1</sup> min <sup>-1</sup> ) | R <sup>2</sup> |
| Cr <sup>3+</sup> | 178.45                               | 179.53                               | 0.014                         | 0.8307         | 172.52                               | 2.61                                             | 0.9999         |
| Pb <sup>2+</sup> | 182.26                               | 183.49                               | 0.014                         | 0.9845         | 156.95                               | 2.82                                             | 0.9995         |
| Zn <sup>2+</sup> | 122.40                               | 122.69                               | 0.053                         | 0.9383         | 176.14                               | 2.24                                             | 0.9999         |
| Cu <sup>2+</sup> | 162.16                               | 162.87                               | 0.040                         | 0.9616         | 172.52                               | 2.71                                             | 0.9991         |
| Co <sup>2+</sup> | 161.50                               | 161.81                               | 0.025                         | 0.9493         | 159.92                               | 2.53                                             | 0.9996         |

## References

- (1) Lou, F. L.; Ye, L.; Kong, M. Q.; Yang, Q.; Li, G. X.; Huang, Y. J. Pickering emulsions stabilized by shape-controlled silica microrods. *RSC Adv.* **2016**, *6* (29), 24195-24202, DOI: 10.1039/C6RA00360E.
- (2) Kuijk, A.; van Blaaderen, A.; Imhof, A. Synthesis of monodisperse, rodlike silica colloids with tunable aspect ratio. *J. Am. Chem. Soc.* **2011**, *133* (8), 2346-2349, DOI: 10.1021/ja109524h.
- (3) He, J.; Hourwitz, M. J.; Liu, Y. J.; Perez, M. T.; Nie, Z. H. One-pot facile synthesis of Janus particles with tailored shape and functionality. *Chem. Commun.* **2011**, *47* (46), 12450-12452, DOI: 10.1039/c1cc15603a.
- (4) Stöber, W.; Fink, A.; Bohn, E. Controlled growth of monodisperse silica spheres in the micron size range. *J. Colloid Interface Sci.* **1968**, *26* (1), 62-69, DOI: 10.1016/0021-9797(68)90272-5.
- (5) Zhang, J. G.; Xu, S. Q.; Kumacheva, E., Polymer microgels: Reactors for semiconductor, metal, and magnetic nanoparticles. *J. Am. Chem. Soc.* **2004**, *126* (25), 7908-7914, DOI: 10.1021/ja031523k.
